# Supplementary material for: NaB(OH)3CH3: a deep-ultraviolet optical crystal with unprecedented methyl-modified [B(OH)3CH3] units
Source: Royal Society of Chemistry journal article supplement (doi:10.1039/d4tc01288g), 2024-01-01
Supplement: d4tc01288g1.pdf [file d4tc01288g1.pdf]

## **NaB(OH)<sub>3</sub>CH<sub>3</sub>: A Deep-Ultraviolet Optical Crystal with Unprecedented Methyl-modification [B(OH)<sub>3</sub>CH<sub>3</sub>] Units**

Chenhui Hu,<sup>a,b</sup> Huimin Li,<sup>a</sup> Jian Han,<sup>a,b,\*</sup> Xueling Hou,<sup>a,b</sup> Zihua Yang,<sup>a,b</sup>  
and Shilie Pan<sup>a,b,\*</sup>

<sup>a</sup> Research Center for Crystal Materials; State Key Laboratory of Functional Materials and Devices for Special Environmental Conditions; Xinjiang Key Laboratory of Functional Crystal Materials; Xinjiang Technical Institute of Physics and Chemistry, CAS, 40-1 South Beijing Road, Urumqi 830011, China.

<sup>b</sup> Center of Materials Science and Optoelectronics Engineering, University of Chinese Academy of Sciences, Beijing 100049, China.

\* Corresponding authors: hanjian@ms.xjb.ac.cn and slpan@ms.xjb.ac.cn.

## EXPERIMENTAL METHODOLOGY

### 1. Synthesis.

Colorless and transparent  $\text{NaB(OH)}_3\text{CH}_3$  crystals were readily grown from the solution through slow evaporation. The raw materials  $\text{B(OH)}_2\text{CH}_3$ , and  $\text{NaOH}$  at a molar ratio of 1:1 were placed in a 100 mL erlenmeyer flask wrapped in plastic wrap and mixed with a small amount of deionized water (20 mL). They were put in a water bath and heated to  $70\text{ }^\circ\text{C}$  for a week. With this process, the colorless crystals of  $\text{NaB(OH)}_3\text{CH}_3$  were obtained. The polycrystalline powder sample was obtained directly from grinding the as-grown crystals, and its purity was checked by X-ray diffraction patterns.<sup>[1]</sup>

### 2. Characterizations.

High-quality crystals were picked under an optical microscope (OM) and applied for the measurements of single-crystal X-ray diffraction. The experiments were carried out at room temperature on a Bruker D8 Venture diffractometer with monochromatic  $\text{Cu K}\alpha$  radiation ( $\lambda = 1.54056\text{ \AA}$ ). The diffraction data were integrated using the SAINT program. Meanwhile, multiscan-type absorption corrections were performed using the SADABS program. To determine the space groups, the XPREP program in the SHELXTL package was used.<sup>[2]</sup> The crystal structures of

NaB(OH)<sub>3</sub>CH<sub>3</sub> were solved by the direct method, and refined using F<sup>2</sup> full matrix least squares. Then, the structures were checked by the PLATON program.<sup>[3, 4]</sup>

UV-vis-NIR diffuse-reflectance spectroscopy data was recorded using a Shimadzu 3700DUV spectrophotometer in the wavelength range from 190-2600 nm at room temperature. The bandgap can be calculated as follows:  $E_g(\text{eV}) = (h/k) \times (c/\lambda)$ . (Planck's constant  $h$  approximately equal  $6.6260693 \times 10^{-34}$  J·s;  $k = 1.6 \times 10^{-19}$  eV;  $c$  is the speed of light;  $\lambda$  is the wavelength) To facilitate the calculation:  $E_g(\text{eV}) = 1240/\lambda$  (nm).

The data of thermal behavior of NaB(OH)<sub>3</sub>CH<sub>3</sub> was collected by NETZSCH STA 449C simultaneous analyzer instrument under flowing nitrogen gas and the sample and Al<sub>2</sub>O<sub>3</sub> reference were put in closed platinum crucibles with a temperature from 40 to 600 °C at a heating rate of 10 °C/ min.

### 3. Calculations

The theoretical calculations of NaB(OH)<sub>3</sub>CH<sub>3</sub> are performed using the plane wave density functional theory (DFT) package CASTEP.<sup>[5, 6]</sup> The exchange-correlation functional was treated by the generalized gradient approximation (GGA) in the formulation of Perdew-Burke-Emzerhoff (PBE) functional, and core-valence interactions were described by norm-conserving pseudopotentials (NCP).<sup>[7, 8]</sup> Because GGA usually

underestimates the bandgap owing to the discontinuity of exchange-correlation energy, the HeydScuseria-Ernzerhof (HSE06) mixed function and PBE0 function implemented in PWmat code<sup>[9-10]</sup> were chosen to provide more accurate bandgap values. Therefore, the bandgap difference between the GGA and experimental value was used as the operation of a scissor to calculate optical properties. The cutoff energy of the plane wave was set to 800 eV. Self-consistent field (SCF) calculations were performed with a convergence criterion of  $5 \times 10^{-7}$  eV/atom on the total energy. The  $k$ -point separation for each material was set as  $0.04 \text{ \AA}^{-1}$  in the Brillouin zone, resulting in the corresponding Monkhorst-Pack  $k$ -point meshes. The linear optical properties were obtained based on the dielectric function:  $\varepsilon(\omega) = \varepsilon_1(\omega) + i\varepsilon_2(\omega)$ . Where  $\varepsilon_1(\omega)$  and  $\varepsilon_2(\omega)$  are the real and imaginary parts of the dielectric function respectively. The imaginary part of the dielectric function  $\varepsilon_2$  can be calculated based on the electronic structures and the real part is obtained by the Kramers-Kronig transformation, accordingly, the refractive indices and the birefringence ( $\Delta n$ ) can be calculated. Finally, the highest occupied molecular orbital (HOMO) and the lowest unoccupied molecular orbital (LUMO) of the  $[\text{B}(\text{OH})_3\text{CH}_3]$  group were calculated using the Gaussian 09 package under the conditions of the 6-31G basis set.

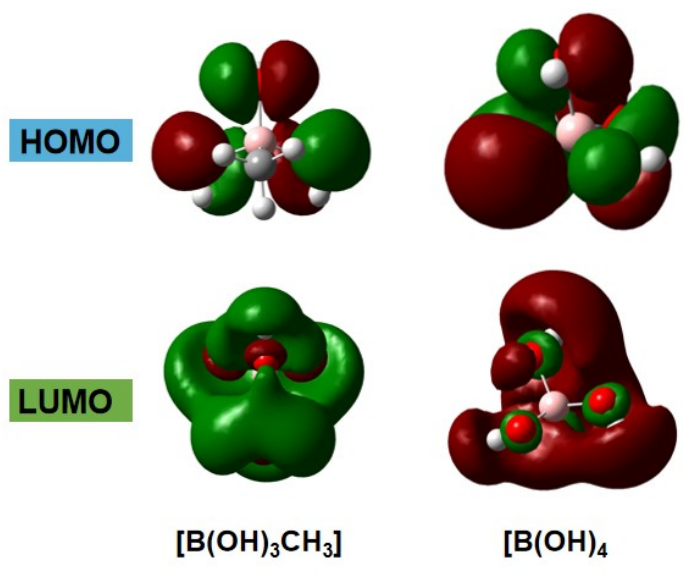

**Figure S1.** The HOMO-LUMO GAP of  $NaB(OH)_3CH_3$  crystal.

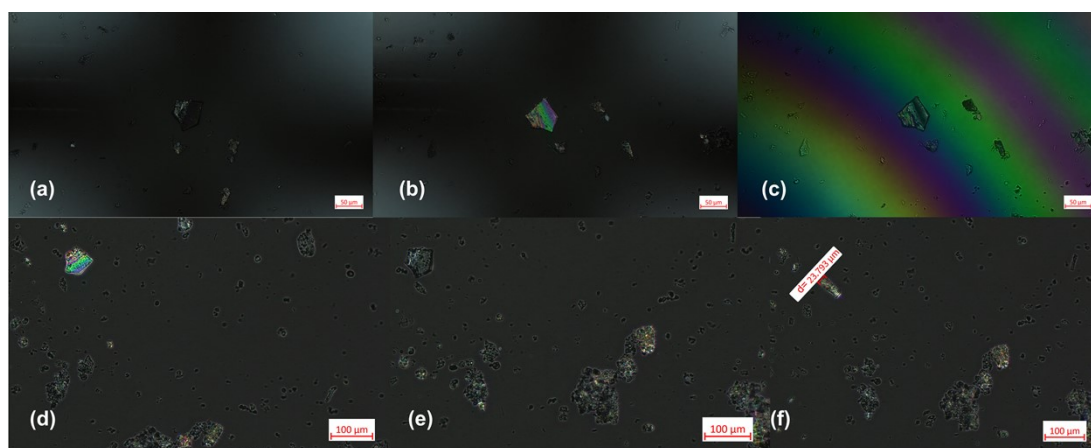

**Figure S2.** (a) and (b)  $\text{NaB}(\text{OH})_3\text{CH}_3$  single crystals under the polarizing microscope. (c) Extinction of the measurement of refractive index difference. (d), (e), and (f) Thickness of the selected crystal.

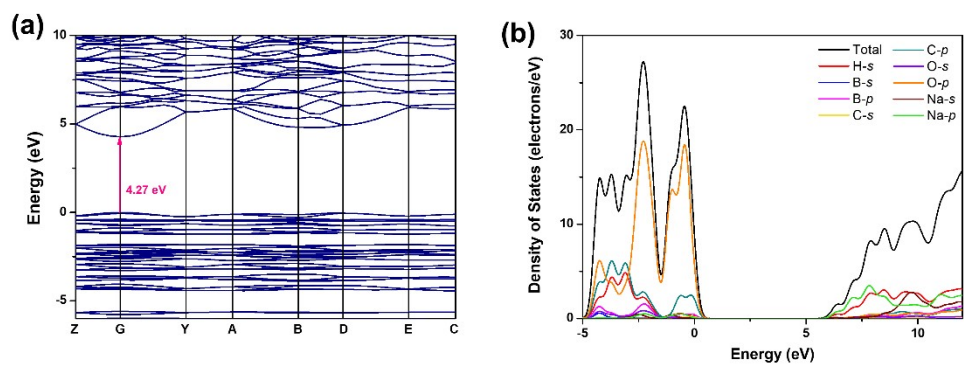

**Figure S3.** (a) The calculated electronic band structures of  $\text{NaB(OH)}_3\text{CH}_3$ .  
(b) The total and partial density of states of  $\text{NaB(OH)}_3\text{CH}_3$ .

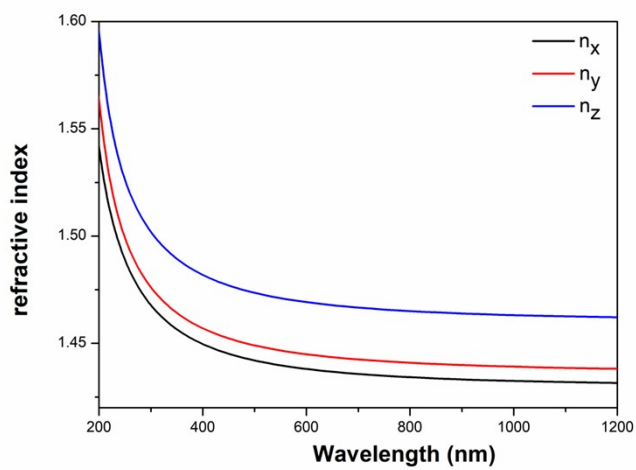

**Figure S4.** The refractive index of  $\text{NaB}(\text{OH})_3\text{CH}_3$ .



**Table S1.** Crystal data and structure refinements for NaB(OH)<sub>3</sub>CH<sub>3</sub>.

| Empirical formula                                                                            | NaB(OH) <sub>3</sub>               |
|----------------------------------------------------------------------------------------------|------------------------------------|
| Temperature (K)                                                                              | 300(2)                             |
| Wavelength (Å)                                                                               | 1.54178                            |
| Crystal system                                                                               | monoclinic                         |
| Space group                                                                                  | <i>P</i> 2 <sub>1</sub> / <i>n</i> |
| Formula weight                                                                               | 99.86                              |
| <i>a</i> (Å)                                                                                 | 9.0897(2)                          |
| <i>b</i> (Å)                                                                                 | 5.60850(10)                        |
| <i>c</i> (Å)                                                                                 | 9.6007(2)                          |
| β (°)                                                                                        | 115.5310(1)                        |
| <i>Z</i> , Volume (Å <sup>3</sup> )                                                          | 4,                                 |
| ρ <sub>Calcd</sub> (mg/m <sup>3</sup> )                                                      | 1.502                              |
| μ(/mm)                                                                                       | 1.981                              |
| <i>F</i> (000)                                                                               | 208                                |
| <i>R</i> (int)                                                                               | 0.0631                             |
| Goodness-of-fit on <i>F</i> <sup>2</sup>                                                     | 1.098                              |
|                                                                                              | <i>R</i> <sub>1</sub> =            |
| Final <i>R</i> indices                                                                       | 0.0266,                            |
| [ <i>F</i> <sub>o</sub> <sup>2</sup> >2σ( <i>F</i> <sub>o</sub> <sup>2</sup> )] <sup>a</sup> | <i>wR</i> <sub>2</sub> =           |
|                                                                                              | 0.0676                             |
|                                                                                              | <i>R</i> <sub>1</sub> =            |
| <i>R</i> indices (all data) <sup>a</sup>                                                     | 0.0309,                            |
|                                                                                              | <i>wR</i> <sub>2</sub> =           |
|                                                                                              | 0.0698                             |
| Largest diff. peak and hole (e·Å <sup>-3</sup> )                                             | 0.236/-<br>0.181                   |

<sup>[a]</sup>  $R_1 = \frac{\sum ||F_o| - |F_c||}{\sum |F_o|}$  and  $wR_2 = [\frac{\sum w(F_o^2 - F_c^2)^2}{\sum wF_o^4}]^{1/2}$  for  $F_o^2 > 2\sigma(F_o^2)$ .

**Table S2.** Fractional atomic Coordinates ( $\times 10^4$ ) and equivalent isotropic displacement parameters ( $\text{\AA}^2 \times 10^3$ ) for  $\text{NaB(OH)}_3\text{CH}_3$ .  $U_{\text{eq}}$  is defined as 1/3 of the trace of the orthogonalised  $U_{ij}$  tensor.

| Atom  | x       | y       | z       | $U(\text{eq})$ |
|-------|---------|---------|---------|----------------|
| Na(1) | 6366(1) | 6489(1) | 6742(1) | 30(1)          |
| B(1)  | 6959(2) | 1255(3) | 4804(2) | 24(1)          |
| C(1)  | 8169(2) | 2761(3) | 4303(2) | 40(1)          |
| O(1)  | 6326(1) | 2737(2) | 5684(1) | 26(1)          |
| O(2)  | 5488(1) | 385(2)  | 3421(1) | 30(1)          |
| O(3)  | 7800(1) | -805(2) | 5827(1) | 31(1)          |

**Table S3.** Bond lengths for NaB(OH)<sub>3</sub>CH<sub>3</sub>.

| Atom         | Length/Å   |
|--------------|------------|
| Na(1)-O(1)   | 2.3304(11) |
| Na(1)-O(1)#3 | 2.5552(11) |
| Na(1)-O(1)#1 | 2.5861(11) |
| Na(1)-O(1)   | 2.3304(11) |
| Na(1)-O(1)#3 | 2.5552(11) |
| Na(1)-O(1)#1 | 2.5861(11) |
| Na(1)-O(2)#1 | 2.3900(12) |
| Na(1)-O(3)#3 | 2.4808(12) |
| Na(1)-O(3)#4 | 2.3999(12) |
| B(1)-O(1)    | 1.4677(19) |
| B(1)-O(2)    | 1.5033(19) |
| B(1)-O(3)    | 1.495(2)   |
| B(1)-C(1)    | 1.616(2)   |
| O(1)-H(4)    | 0.76(2)    |
| O(3)-H(6)    | 0.958(10)  |
| C(1)-H(2)    | 0.9600     |
| C(1)-H(3)    | 0.9600     |
| C(1)-H(1)    | 0.9600     |
| C(1)-H(2)    | 0.9600     |
| C(1)-H(3)    | 0.9600     |
| C(1)-H(1)    | 0.9600     |

Symmetry transformations used to generate equivalent atoms:

#1  $-x+1,-y+1,-z+1$  #2  $-x+3/2,y-1/2,-z+3/2$  #3  $-x+3/2,y+1/2,-z+3/2$

#4  $x, y+1, z$  #5  $x, y-1, z$

**Table S4.** Bond angles for NaB(OH)<sub>3</sub>CH<sub>3</sub>.

| Atom                    | Angle/°   |
|-------------------------|-----------|
| O(1)-Na(1)-O(1)#3       | 121.39(4) |
| O(1)#3-Na(1)-<br>O(1)#1 | 152.73(3) |
| O(1)-Na(1)-O(1)#1       | 85.88(4)  |
| O(1)-Na(1)-O(2)#1       | 139.11(4) |
| O(1)-Na(1)-O(3)#3       | 83.26(4)  |
| O(1)-Na(1)-O(3)#4       | 108.68(4) |
| O(2)#1-Na(1)-<br>O(1)#1 | 56.71(3)  |
| O(2)#1-Na(1)-<br>O(1)#3 | 97.14(4)  |
| O(2)#1-Na(1)-<br>O(3)#4 | 89.50(4)  |
| O(2)#1-Na(1)-<br>O(3)#3 | 111.29(4) |
| O(3)#3-Na(1)-<br>O(1)#3 | 56.04(3)  |
| O(3)#3-Na(1)-<br>O(1)#1 | 136.16(4) |
| O(3)#4-Na(1)-<br>O(1)#3 | 80.33(4)  |
| O(3)#4-Na(1)-<br>O(1)#1 | 90.95(4)  |
| O(3)#4-Na(1)-           | 132.72(3) |

|                |            |
|----------------|------------|
| O(3)#3         |            |
| O(1)-B(1)-O(2) | 105.80(12) |
| O(1)-B(1)-O(3) | 106.03(11) |
| O(1)-B(1)-C(1) | 111.17(13) |
| O(2)-B(1)-C(1) | 111.52(12) |
| O(3)-B(1)-O(2) | 109.72(12) |
| O(3)-B(1)-C(1) | 112.27(13) |

---

Symmetry transformations used to generate equivalent atoms:

#1  $-x+1, -y+1, -z+1$  #2  $-x+3/2, y-1/2, -z+3/2$  #3  $-x+3/2, y+1/2, -z+3/2$

#4  $x, y+1, z$  #5  $x, y-1, z$

**Table S5.** Hydrogen coordinates (  $\times 10^4$ ) and isotropic displacement parameters (  $\times 10^3$ ) for NaB(OH)<sub>3</sub>CH<sub>3</sub>.

| Atom | x        | y        | z        | <i>U</i> (eq) |
|------|----------|----------|----------|---------------|
| H(1) | 8503     | 1787     | 3669     | 60            |
| H(2) | 9111     | 3245     | 5209     | 60            |
| H(3) | 7611     | 4148     | 3733     | 60            |
| H(4) | 5800(20) | 1960(30) | 5940(20) | 29(5)         |
| H(5) | 5772     | -136     | 2776     | 44            |
| H(6) | 8530(30) | -        | 5490(30) | 84(8)         |
|      |          | 1590(40) |          |               |

## REFERENCES

- (1) Pizer, R.; Tihal, C. Equilibria and Reaction-Mechanism of the Complexation of Methylboronic Acid with Polyols. *Inorg. Chem.* **1992**, *31*, 3243-3247.
- (2) Sheldrick, G. M. A Short History of SHELX. *Acta Crystallogr. A* **2008**, *64*, 112-122.
- (3) Haming, L.; Sheldrick, G. M. SADABS: A Program For Exploiting The Redundancy of Area-Detector X-Ray Data. *Acta Crystallogr. A* **1999**, *55*, No. 206.
- (4) Spek, A. L. Single-Crystal Structure Validation with the Program PLATON. *J. Appl. Crystallogr.* **2003**, *36*, 7-13.
- (5) Clark, S. J.; Segall, M. D.; Pickard, C. J.; Hasnip, P. J.; Probert, M. I.; Refson, K.; Payne, M. C. First Principles Methods Using CASTEP. *Z. Kristallogr. - Cryst. Mater.* **2005**, *220*, 567.
- (6) Kohn, W. Nobel Lecture: Electronic Structure of Matterwave Functions and Density Functionals. *Rev. Mod. Phys.* **1999**, *71*, 1253.
- (7) Perdew, J. P.; Burke, K.; Ernzerhof, M. Generalized Gradient Approximation Made Simple. *Phys. Rev. Lett.* **1996**, *77*, 3865.
- (8) Rappe, A. M.; Rabe, K. M.; Kaxiras, E.; Joannopoulos, J. D. Optimized Pseudopotentials. *Phys. Rev. B* **1990**, *41*, 1227.
- (9) Heyd, J.; Scuseria, G. E.; Ernzerhof, M. Hybrid Functionals Based on



a Screened Coulomb Potential. *J. Chem. Phys.* **2003**, *118*, 8207-8215.

(10) Jia, W. L.; Fu, J. Y.; Cao, Z. Y.; Wang, L.; Chi, X. B.; Gao, W. G.; Wang, L. W., Fast Plane Wave Density Functional Theory Molecular Dynamics Calculations on Multi-GPU Machines. *J. Comput. Phys.* **2013**, *251*, 102-115.

The explanation for alert level B found from the CHECKCIF report for NaB(OH)<sub>3</sub>CH<sub>3</sub>: Although the crystal data are good ( $R_{int} = 0.0631$ ) and the structure solution parameters ( $R_1 = 0.0266$ ,  $wR_2 = 0.0698$ ,  $GOF = 1.098$ ) are reasonable, there is no suitable receptor in the surrounding environment.
